# Supplementary material
Source: PubMed Central journal article supplement (PMC8212401)
Supplement: NIHMS1698270-supplement-1.pdf [file NIHMS1698270-supplement-1.pdf]

### Supplemental Figure 1: Plasmid Insert Sequence

1 CACTATAGGGCGAATTGAAGGAAGGCCGTCAAGGCCGCATGATTTGGACC  
51 TGCGAGCGGGTTCTGACCTGAAGGCTCTGCGCGGACTTGTGGAGACAGCC  
101 GCTAATACGACTCACTATAGGGAGATCTAGAAACTAGGGAACCCACTGCT  
151 TAAGCCTCAATAAAGCTTGCCTTGAGTGCTTCAAGTAGTGGAAGGGCTAA  
201 TTCACTCCCAACGAAGACAAGATATCCTTGATCTGTGGATAATACGACTC  
251 ACTATAGGGAGATCTAGAGAAAATCTCTAGCAGTGGCGCCCGAACAGGGA  
301 CCTGAAAGCGAAAGGGAAACCAGAGGAGCTCTCTCGACGCAGGACTCGGC  
351 TTGCTGAAGCGCGCACGGCAAGAGGCGAGGGGCGGCGACTGGTGAGTACG  
401 CCAAAAATTTTACTAGCGGAGGCTAGAAGGAGATAATACGACTCACTAT  
451 AGGGAGATCTAGAAGTGGGGGGACATCAAGCAGCCATGCAAATGTTAAAA  
501 GAGACCATCAATGAGGAAGCTGCAGAATGGGATAGAGTGCATCCAGTGCA  
551 TGCAGGGCCTATTGCACCAGGCCAGATGAGAGAACCAAGGGGAAGTGACA  
601 TAGCATAATACGACTCACTATAGGGAGATCTAGACTGGGCCTCATGGGCC  
651 TTCCTTCACTGCCCCGCTTCCAG
