# Supplementary material
Source: PubMed Central journal article supplement (PMC8212401)
Supplement: NIHMS1698270-supplement-2.pdf [file NIHMS1698270-supplement-2.pdf]

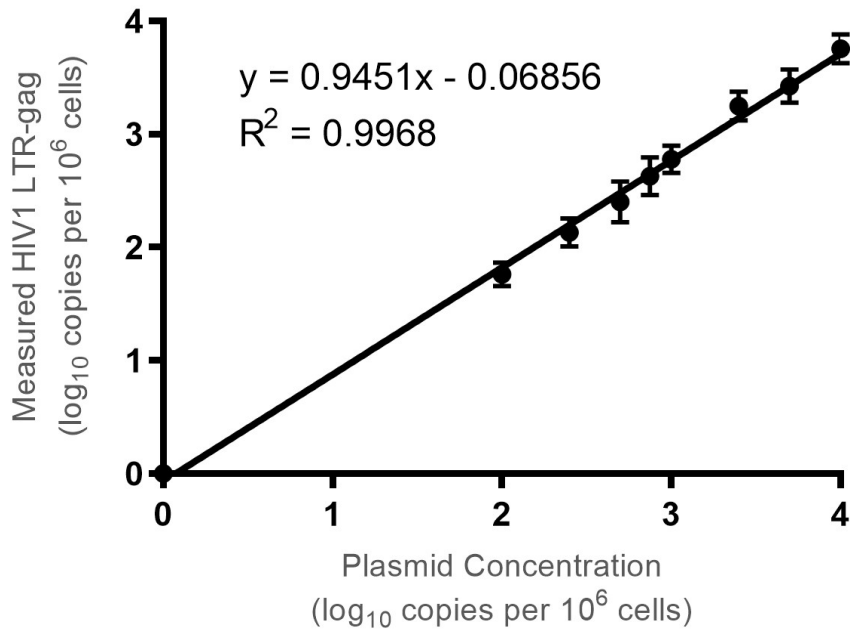

**Supplemental Figure 2:** Measured high concentration HIV-1 LTR-gag copies (log<sub>10</sub>) from six replicate experiments with PBMCs from two different donors plotted against expected plasmid copies per 10<sup>6</sup> cells (log<sub>10</sub>).
