# Supplementary material
Source: PubMed Central journal article supplement (PMC8212401)
Supplement: NIHMS1698270-supplement-4.pdf [file NIHMS1698270-supplement-4.pdf]

**Supplemental Table 1: Primer and Probe Sequences**

| PROBE NAME          | SEQUENCE                                |
|---------------------|-----------------------------------------|
| <b>LTRGAG F</b>     | TCTCTAGCAGTGGCGCCCGAACA                 |
| <b>LTRGAG R</b>     | TTCCTTCTAGCCTCCGCTAGTC                  |
| <b>LTRGAG PROBE</b> | /HEX/CAAGCCGAG/ZEN/TCCTGCGTCGAGAG/IBFQ/ |
| <b>RPP30 F</b>      | GATTTGGACCTGCGAGCG                      |
| <b>RPP30 R</b>      | GCGGCTGTCTCCACAAGT                      |
| <b>RPP30 PROBE</b>  | /HEX/CT+G+ACCTGA+AG+GCTCT/IBFQ/         |

/HEX/: Hex fluorescent dye

/ZEN/: ZEN internal quencher

/IBFQ/: Iowa Black Fluorescent Quencher

+G, +A: Locked Nucleic Acid
