# Supplementary material
Source: PubMed Central journal article supplement (PMC8212401)
Supplement: NIHMS1698270-supplement-5.pdf [file NIHMS1698270-supplement-5.pdf]

**Supplemental Table 2. Inter-assay precision**

| <b>ANALYTE<br/>COPIES PER<br/>MILLION<br/>CELLS</b> | <b>AVERAGE MEASURED HIV-<br/>LTRGAG COPY PER MILLION<br/>CELLS (RANGE)</b> | <b>STANDARD<br/>DEVIATION</b> | <b>COEFFICIENT<br/>OF VARIATION</b> |
|-----------------------------------------------------|----------------------------------------------------------------------------|-------------------------------|-------------------------------------|
| <b>1,000</b>                                        | 429.49 (266.52-585.02)                                                     | 104.00                        | 24.22%                              |
| <b>100</b>                                          | 99.37 (67.11-135.36)                                                       | 28.32                         | 28.50%                              |
| <b>25</b>                                           | 22.53 (14.20-36.38)                                                        | 7.80                          | 34.63%                              |
| <b>10</b>                                           | 12.91 (4.37-20.34)                                                         | 6.89                          | 53.39%                              |
| <b>7.5</b>                                          | 5.99 (2.48-11.00)                                                          | 2.80                          | 46.70%                              |
| <b>5</b>                                            | 6.46 (1.61-9.57)                                                           | 3.02                          | 46.79%                              |
| <b>2.5</b>                                          | 3.10 (0-6.69)                                                              | 2.62                          | 84.55%                              |
| <b>1.25</b>                                         | 0.52 (0-1.57)                                                              | 0.81                          | 154.92%                             |
| <b>0</b>                                            | 0 (0-0)                                                                    | 0                             | N/A                                 |
