# Supplementary material
Source: PubMed Central journal article supplement (PMC8212401)
Supplement: NIHMS1698270-supplement-6.pdf [file NIHMS1698270-supplement-6.pdf]

**Supplemental Table 3: Intra-assay Precision**

| <b>ANALYTE<br/>COPIES PER<br/>MILLION<br/>CELLS</b> | <b>STANDARD<br/>DEVIATION,<br/>DONOR 1</b> | <b>COEFFICIENT<br/>OF VARIATION<br/>DONOR 1</b> | <b>STANDARD<br/>DEVIATION<br/>DONOR 2</b> | <b>COEFFICIENT<br/>OF VARIATION<br/>DONOR 2</b> |
|-----------------------------------------------------|--------------------------------------------|-------------------------------------------------|-------------------------------------------|-------------------------------------------------|
| <b>1,000</b>                                        | 89.56                                      | 18.26%                                          | 88.72                                     | 24.08%                                          |
| <b>100</b>                                          | 26.19                                      | 28.01%                                          | 34.85                                     | 33.09%                                          |
| <b>25</b>                                           | 8.08                                       | 29.86%                                          | 5.01                                      | 27.83%                                          |
| <b>10</b>                                           | 5.40                                       | 69.39%                                          | 3.25                                      | 18.03%                                          |
| <b>7.5</b>                                          | 2.00                                       | 42.71%                                          | 3.23                                      | 44.26%                                          |
| <b>5</b>                                            | 3.30                                       | 64.74%                                          | 2.53                                      | 32.31%                                          |
| <b>2.5</b>                                          | 2.25                                       | 45.21%                                          | 1.25                                      | 101.95%                                         |
| <b>1.25</b>                                         | 0.91                                       | 173.21%                                         | 0.90                                      | 173.21%                                         |
| <b>0</b>                                            | 0                                          | N/A                                             | 0                                         | N/A                                             |
